# Supplementary material for: Tough and adhesive conductive hydrogels with fast gelation from a polyphenol–aluminium ion dual self-catalysis system for wearable strain sensors and triboelectric nanogenerators
Source: Royal Society of Chemistry journal article supplement (doi:10.1039/d4tc02897j), 2024-01-01
Supplement: d4tc02897j1.pdf [file d4tc02897j1.pdf]

**Tough and adhesive conductive hydrogel with fast gelation from polyphenols-aluminium ion dual self-catalysis system for wearable strain sensors and triboelectric nanogenerators**

Maolin Yu, Yuecong Luo, Qiannian Yang, Tengfei Duan, Zengmin Tang, Lijian Xu, Na Li, and Jianxiong Xu\*

Hunan Key Laboratory of Biomedical Nanomaterials and Devices, College of Life Sciences and Chemistry, Hunan University of Technology, Zhuzhou 412007, P. R. China

E-mail: xujianxiong8411@163.com (J. Xu)

**Table S1.** Summary of mechanical properties of the hydrogels by self-catalytic system.

| Hydrogel                               | Tensile strength (kPa) | Tensile strain (%) | Adhesion (kPa) | GF <sup>a)</sup>                             | Ref              |
|----------------------------------------|------------------------|--------------------|----------------|----------------------------------------------|------------------|
| AgNP@GCOL/PAA                          | 123                    | 916                | 42.8           | N.D.                                         | [S1]             |
| MoS <sub>2</sub> -Containing Composite | 30                     | 85                 | No             | N.D.                                         | [S2]             |
| PAA/ZnCl <sub>2</sub> /lignin          | 2510                   | 336                | 62.05          | 1.678 (0-10%)<br>2.104 (10-300%)             | [S3]             |
| P(AA-DAM)/PVA                          | 50                     | 1050               | 17.42          | 1.24 (0-50%)<br>3.57 (50-300%)               | [S4]             |
| PAM@CNC/TA-Ag NC                       | 128.12                 | 1500               | 17             | 1.02 (0-200%)                                | [S5]             |
| AL-Cu@W/EG-PAM                         | 136.1                  | 550                | 26.8           | N.D.                                         | [S6]             |
| <b>PVA/PHEAA-TA-Al<sup>3+</sup></b>    | <b>240</b>             | <b>920</b>         | <b>108</b>     | <b>1.3 (0-200%)</b><br><b>2.7 (200-600%)</b> | <b>This work</b> |

<sup>a)</sup>N.D.: no data.

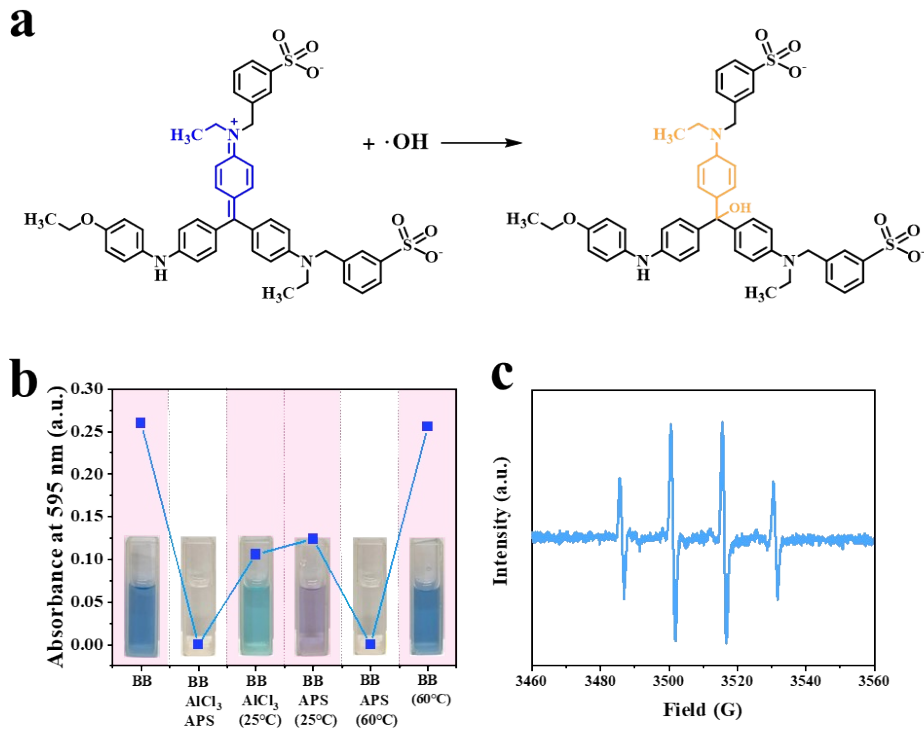

**Fig. S1** (a) Discoloration mechanism diagram of Coomassie brilliant blue as an indicator of hydroxyl radical, (b) The color change of BB was measured by spectrophotometry under different conditions. (c) ESR spectrum of precursor solution of PVA/PHEAA-TA- $\text{Al}^{3+}$  gel.

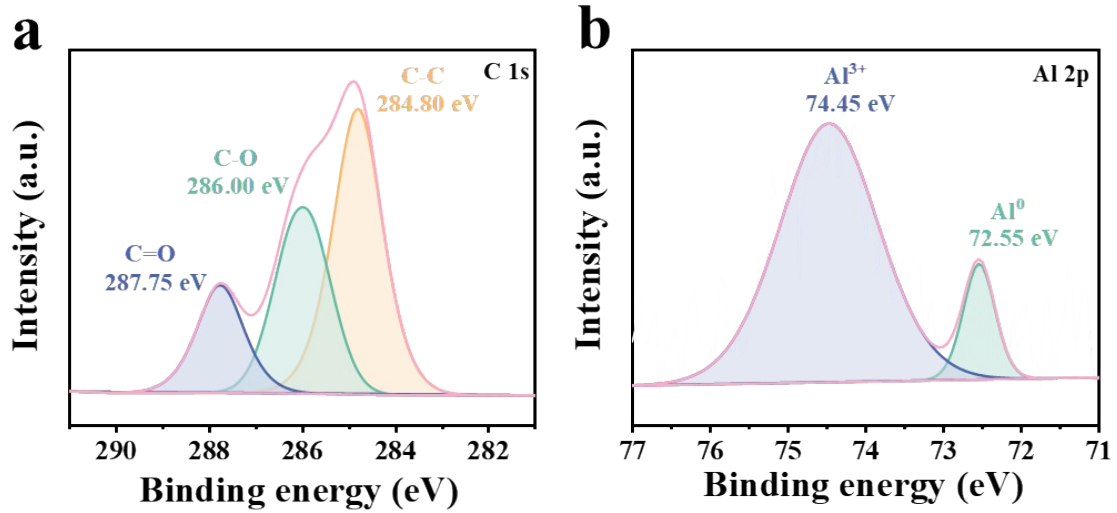

**Fig. S2** High-resolution XPS spectra of (a) C 1s and (b) Al 2p of PVA/PHEAA-TA- $\text{Al}^{3+}$  gel.

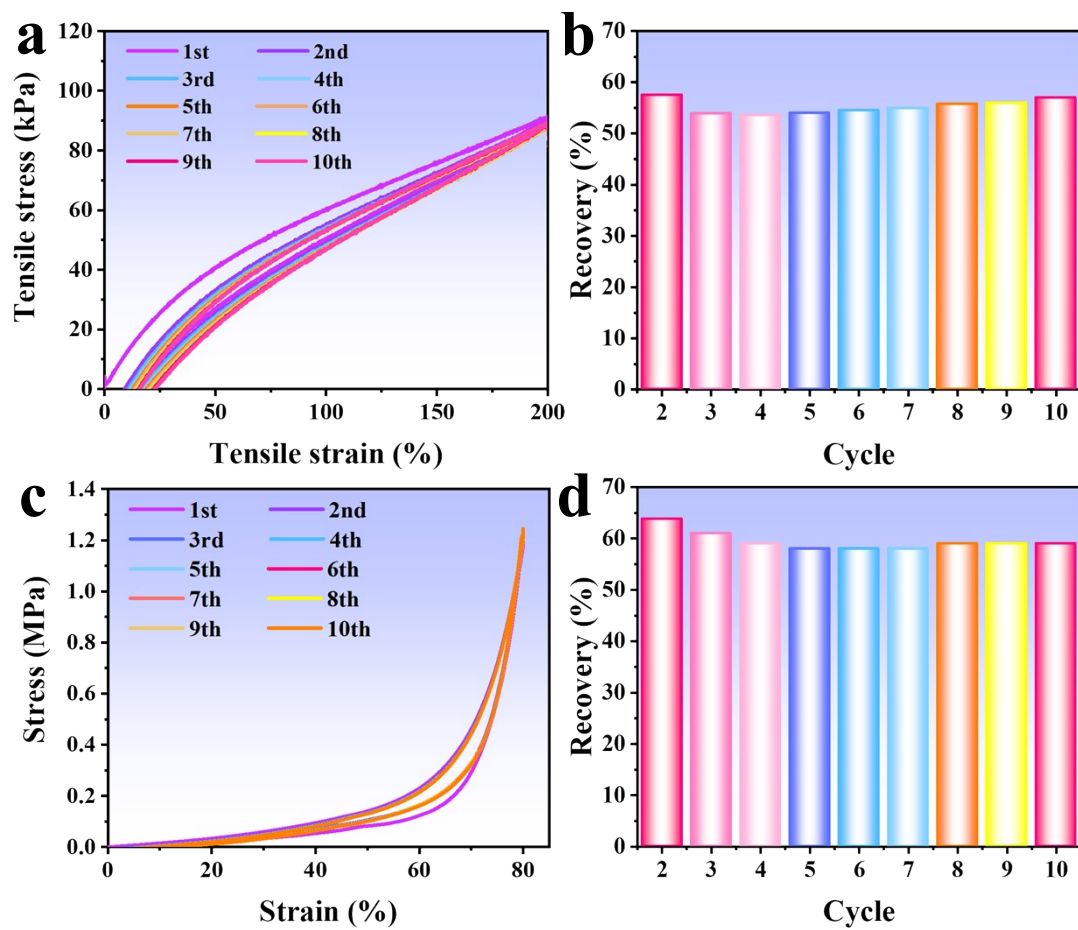

**Fig. S3** The loading-unloading cyclic curve of PVA/PHEAA-TA- $\text{Al}^{3+}$  DN gel under (a) 200% strain and (b) the relative recovery rate of each cycle. (c) The consecutive compressive cyclic loading-unloading curves of PVA/PHEAA-TA- $\text{Al}^{3+}$  DN gel under 80% strain and (d) relative recovery rate of each cycle.

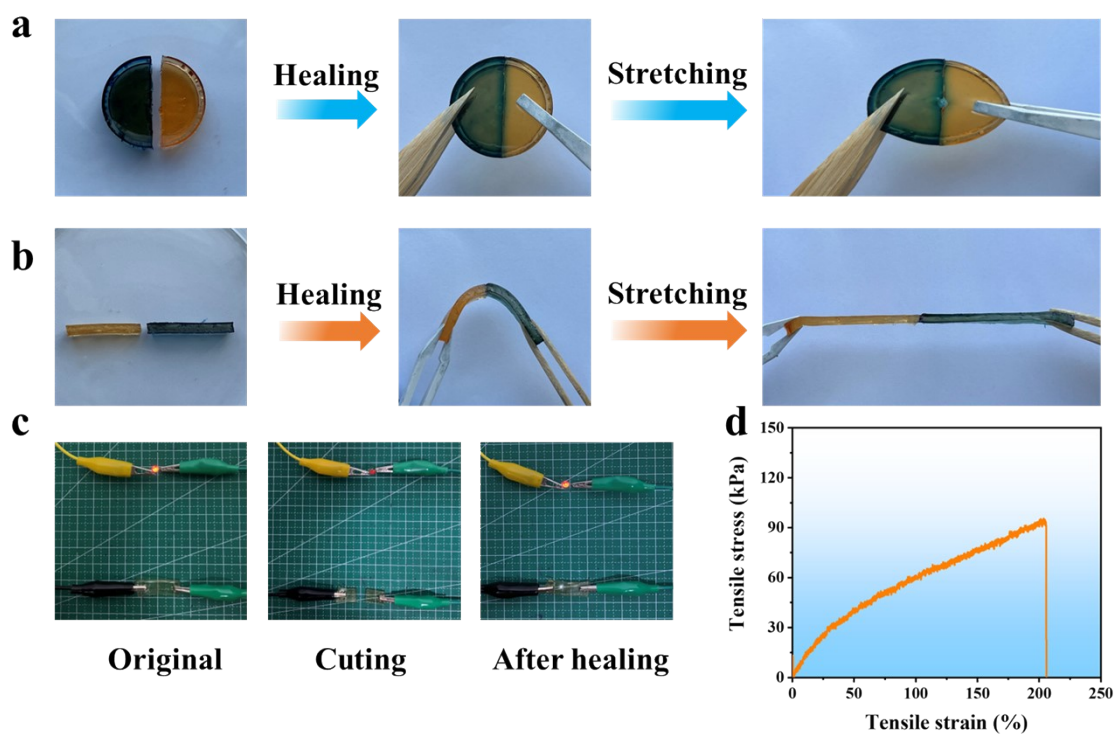

**Fig. S4** Visualization of the self-healing ability of PVA/PHEAA-TA-Al<sup>3+</sup> DN gel for 6 h, as well as (a) the stretching and (b) bending photos of the self-healing hydrogel. (c) Illuminance variation of LED light during PVA/PHEAA-TA-Al<sup>3+</sup> DN gel cutting/healing, (d) The stress-strain curve of PVA/PHEAA-TA-Al<sup>3+</sup> DN gel after healing for 6 h at 25°C.

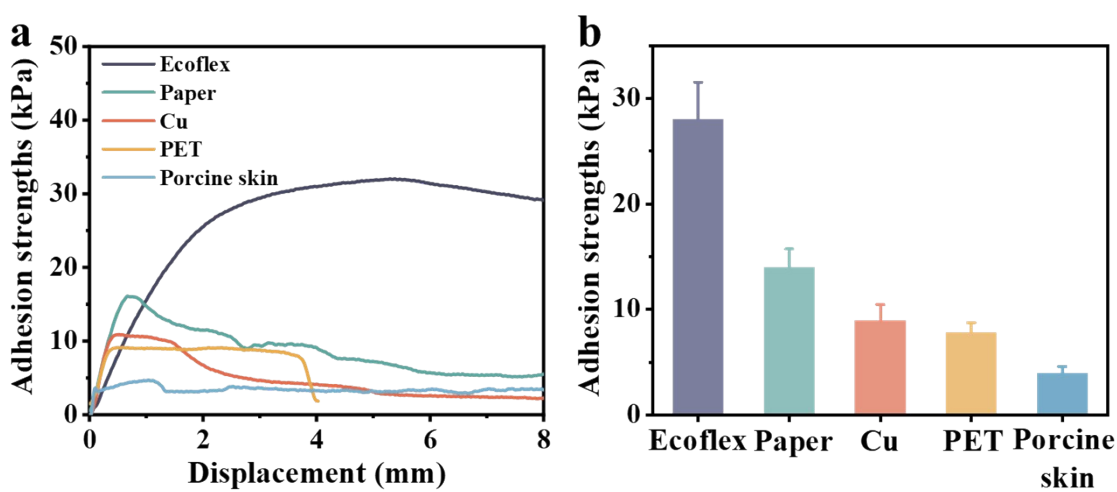

**Fig. S5** The adhesive (a) curves and (b) strength of the hydrogels on different substrates.

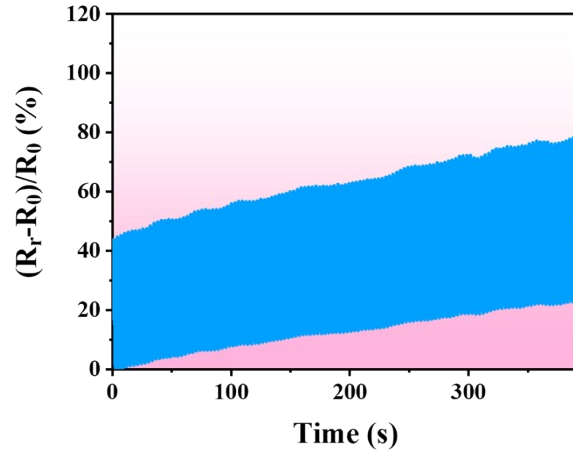

**Fig. S6** Durability test of PVA/PHEAA-TA- $\text{Al}^{3+}$  gel-based sensor for 500 cycles from 0% to 50% strain.

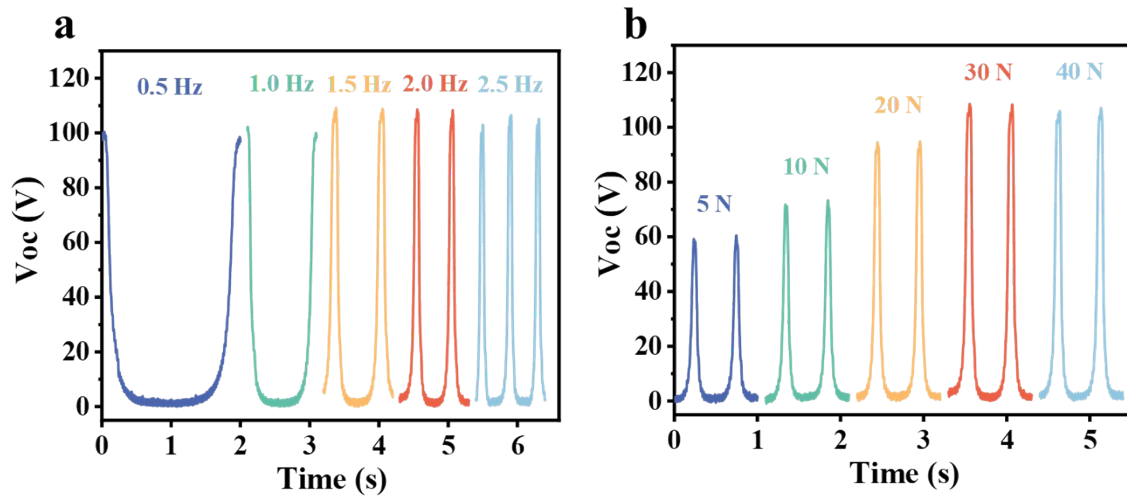

**Fig. S7** The values of  $V_{OC}$  under different (a) frequencies (0.5-2.5 Hz) and (b) pressures (5-40 N).

## References

- [S1] M. Zhang, Q. Yang, T. Hu, L. Tang, Y. Ni, L. Chen, H. Wu, L. Huang and C. Ding, *ACS Appl. Mater. Interfaces*, 2022, **14**, 8728-8742.
- [S2] K. M. Lee, Y. Oh, H. Yoon, M. Chang and H. Kim, *ACS Appl. Mater. Interfaces*, 2020, **12**, 8642-8649.
- [S3] Y. Yang, Y. Zhu, A. Yang, T. Liu, Y. Fang, W. Wang, Y. Song and Y. Li, *Int. J. Biol. Macromol*, 2024, **260**, 129378.
- [S4] Y. Jiang, Y. Chen, W. Feng, X. Zhong, D. Yu and W. Wang, *Chem. Eng. J.*, 2024, **484**, 149460.
- [S5] S. Hao, C. Shao, L. Meng, C. Cui, F. Xu and J. Yang, *ACS Appl. Mater. Interfaces*, 2020, **12**, 56509-56521.
- [S6] D. Sun, Y. Feng, S. Sun, J. Yu, S. Jia, C. Dang, X. Hao, J. Yang, W. Ren, R. Sun, C. Shao and F. Peng, *Adv. Funct. Mater.*, 2022, **32**, 2201335.
